# Supplementary material
Source: publisher figshare collection journal article supplement (https://acs.figshare.com/ndownloader/files/3781432)
Supplement: Supplementary file 1 [file 3781432]

*Supporting Information for*

# **Synthesis and Characterization of Atomically Flat Methyl-Terminated Ge(111) Surfaces**

Keith T. Wong<sup>1</sup>, Youn-Geun Kim<sup>2</sup>, Manuel P. Soriaga<sup>2</sup>, Bruce S. Brunschwig<sup>2-3</sup>, and Nathan S. Lewis<sup>1-4\*</sup>

<sup>1</sup>*Division of Chemistry and Chemical Engineering*

<sup>2</sup>*Joint Center for Artificial Photosynthesis*

<sup>3</sup>*Beckman Institute*

<sup>4</sup>*Kavli Nanoscience Institute*

*California Institute of Technology, Pasadena, California 91125, United States*

*\*E-mail: nslewis@caltech.edu*

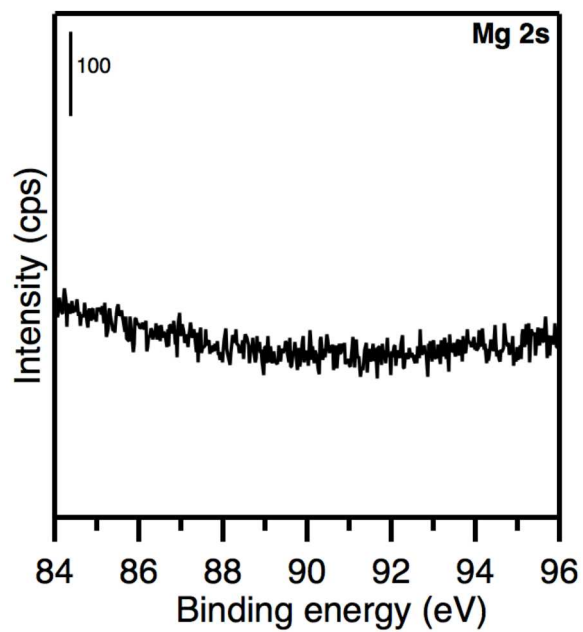

**Figure S1.** High-resolution XP spectrum of the Mg 2s region of a CH<sub>3</sub>-Ge(111) surface. No Mg from the (CH<sub>3</sub>)<sub>2</sub>Mg used for methylation was detected after sonication of methylated surfaces in THF, methanol, and water.

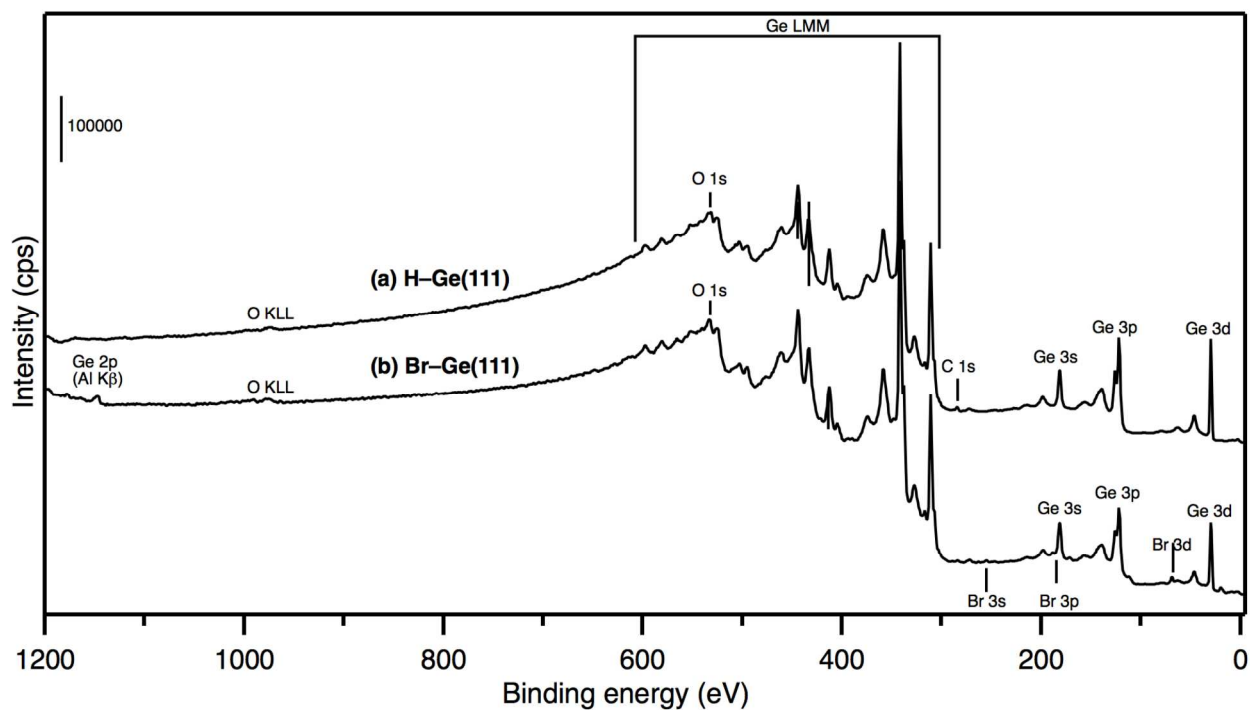

**Figure S2.** XP survey spectra of (a) an H-Ge(111) surface and (b) a Br-Ge(111) surface. No contaminant elements were detected in either spectrum. Note that spectrum b was collected using a non-monochromatic Al X-ray source, leading to the small peak at 1147 eV from Al K $\beta$  excitation of Ge 2p photoelectrons.

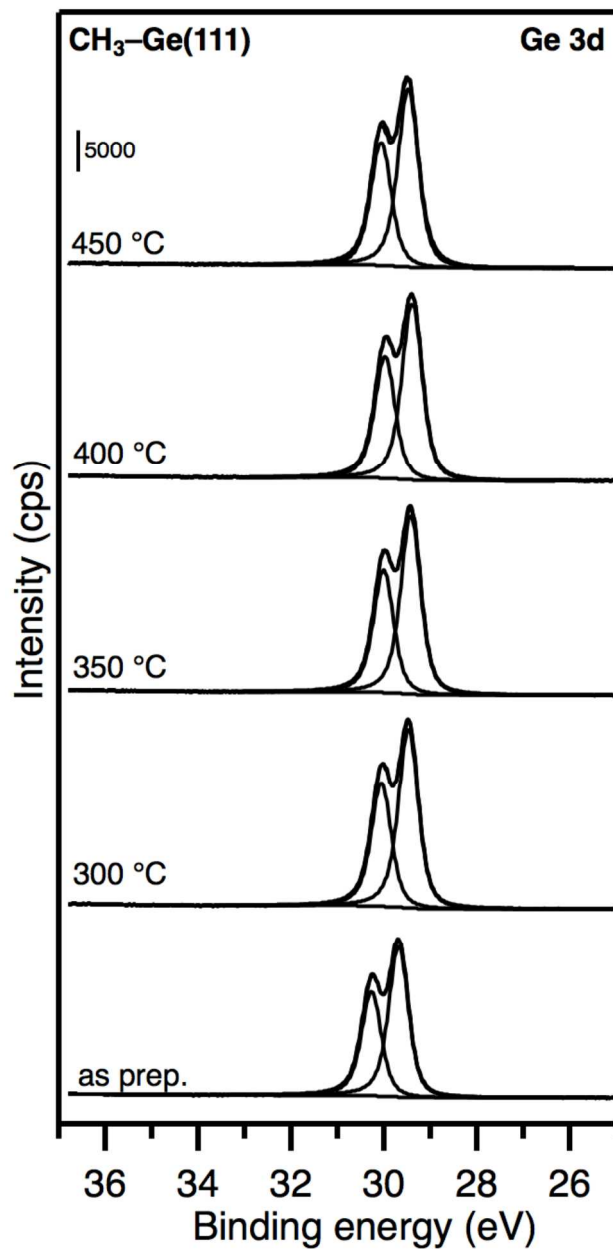

**Figure S3.** High-resolution XPS spectra of the Ge 3d photoelectron region of a CH<sub>3</sub>-Ge(111) surface (bottom to top) as prepared and after sequential 60 min anneals in UHV at 300, 350, 400, and 450 °C. No significant shift of the Ge 2p peaks or oxidation was detected upon annealing.
